# Supplementary material
Source: HighWire-hosted journal article supplement (https://bmjopen.bmj.com/content/9/10/e031415)

**Supplementary figure 1. Estimated smallpox vaccination scar prevalence in different age groups for each sequential HIV survey among women**

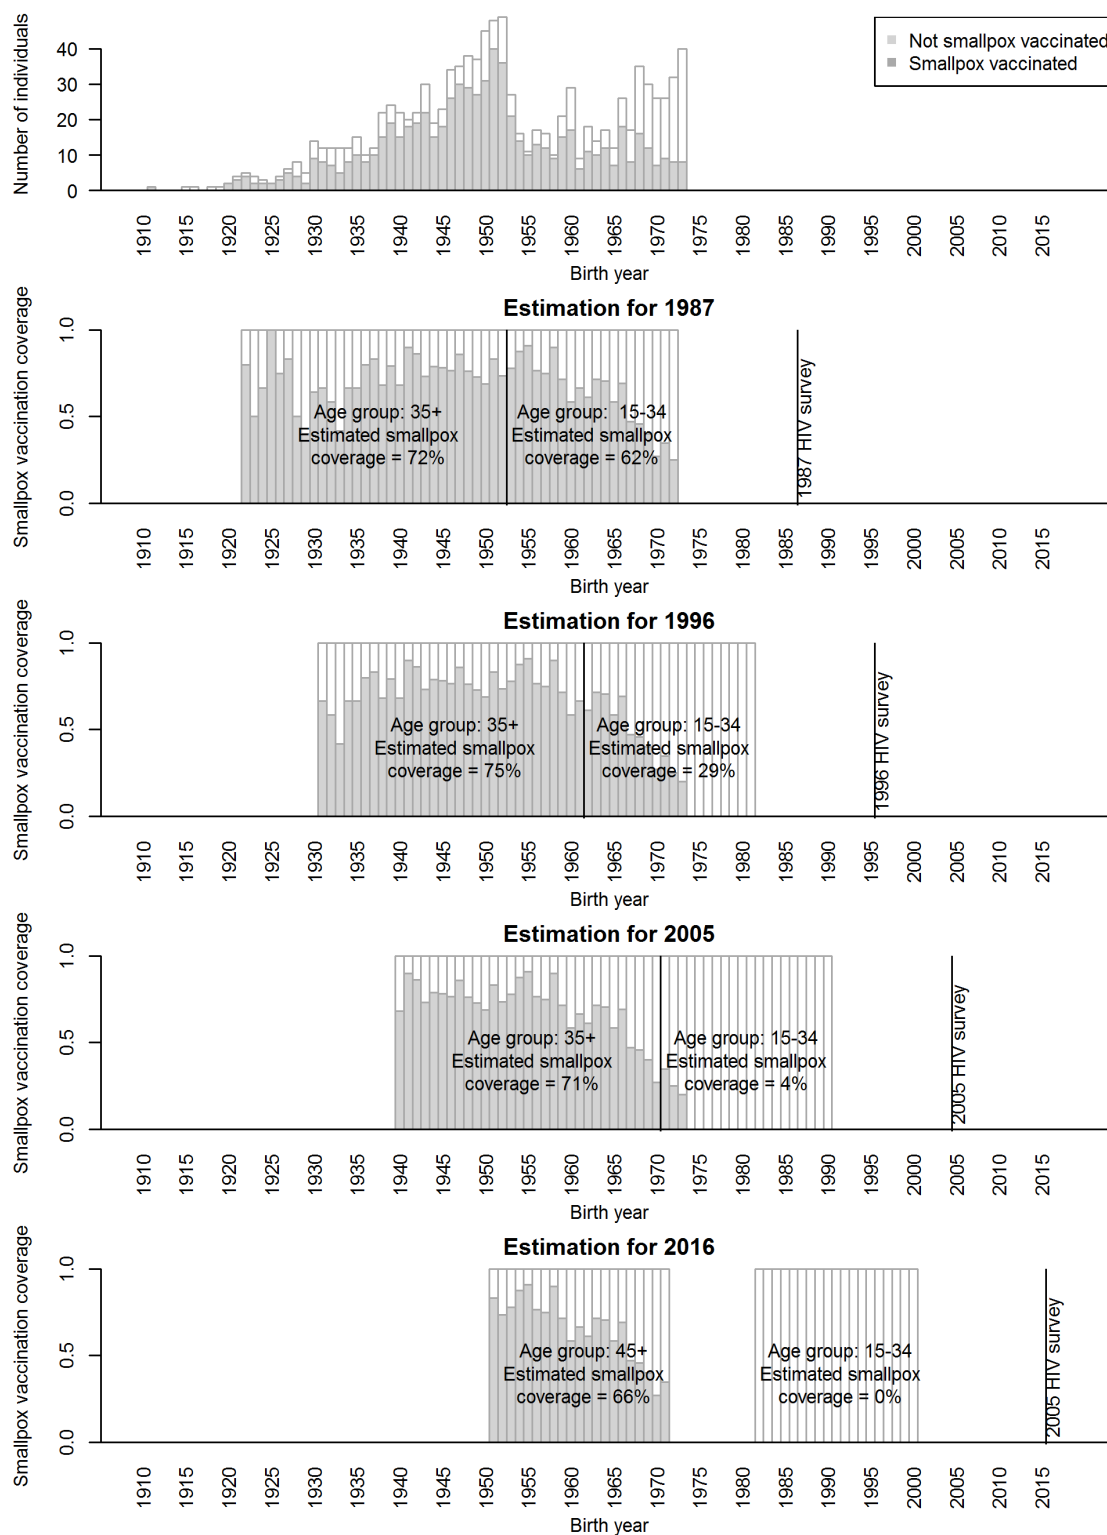

**Supplementary figure 2. Estimated smallpox vaccination scar prevalence in different age groups for each sequential HIV survey among men**

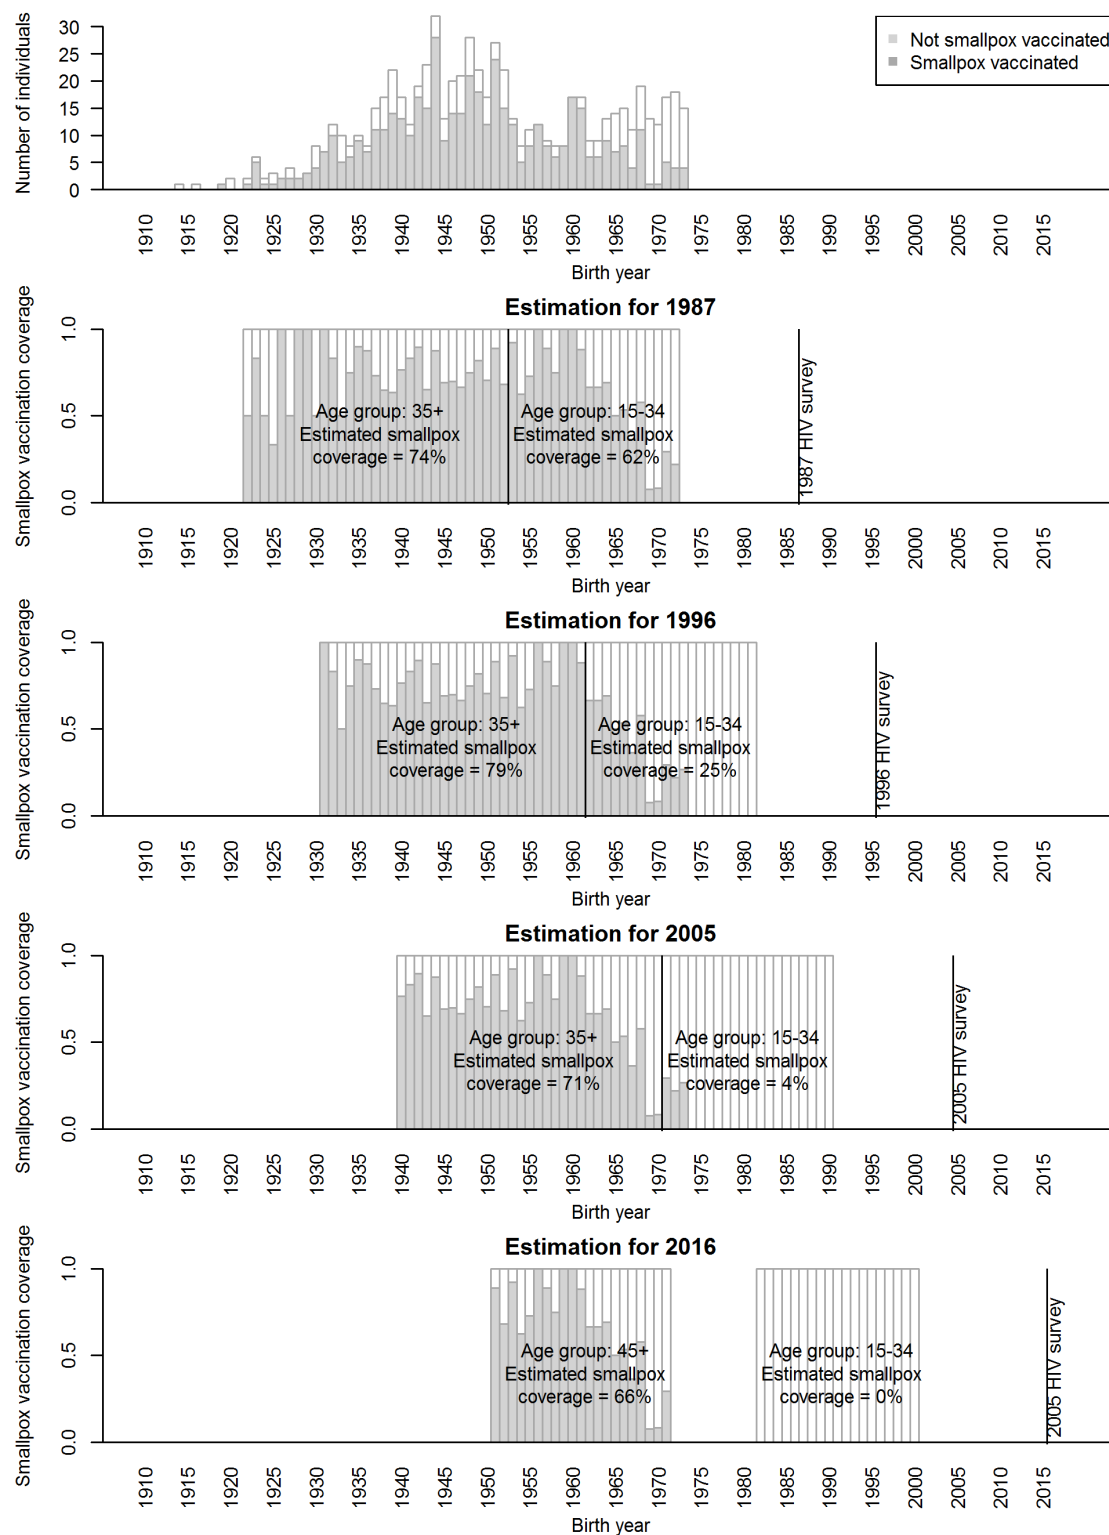

Supplement: inline-supplementary-material-1 [file inline-supplementary-material-1.pdf]
